# Supplementary material
Source: Springer Nature journal article supplement (https://www.springermedizin.de/resource/supplementary/13075_2013_4407_MOESM1_ESM.pdf/10110346)
Supplement: MOESM1 [file 10110346]

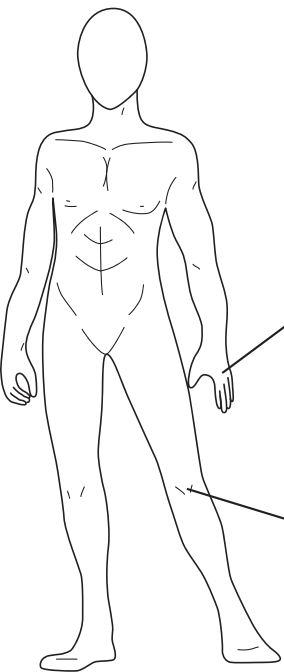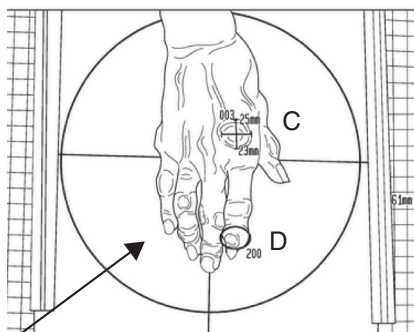

Patient has 4 baseline tophi;  
2 measurable on the knee (A and B),  
1 measurable (C) and  
1 unmeasurable (D) on the hand

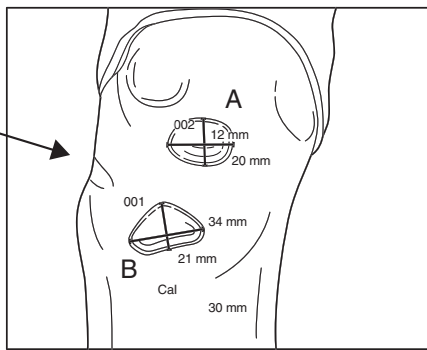

Target tophus outcomes  
for 4 tophi at 6 months

|                             |    |
|-----------------------------|----|
| Left knee 1 (A)             | CR |
| Left knee 2 (B)             | PR |
| Right hand measurable (C)   | CR |
| Right hand unmeasurable (D) | SD |

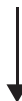

Best "overall" patient  
response is CR without  
new/progressing tophi
